# Supplementary material for: Automated analysis of calcium spiking profiles with CaSA software: two case studies from root-microbe symbioses
Source: PubMed Central journal article supplement (PMC3880239; doi:10.1186/1471-2229-13-224), 2013-12-26
Supplement: 1471-2229-13-224-S6.pdf [file 1471-2229-13-224-S6.pdf]

**Supplementary File 9. Table summarizing the number of biological replicates used to generate the data for this research.** Since glomeromycota and rhizobia target different cell types, fungal signals effects were analysed in atrichoblasts from root organ cultures (ROC) and Nod factors (NF) effects in root hairs from composite plants.

|                                  | N° of roots | Material        | N° of cells | Cell type     |
|----------------------------------|-------------|-----------------|-------------|---------------|
| E <sub>LP</sub> -M <sub>LP</sub> | 5           | ROC             | 55          | atrichoblasts |
| E <sub>LP</sub> -M <sub>HP</sub> | 5           | ROC             | 46          | atrichoblasts |
| E <sub>HP</sub> -M <sub>LP</sub> | 5           | ROC             | 64          | atrichoblasts |
| E <sub>HP</sub> -M <sub>HP</sub> | 5           | ROC             | 46          | atrichoblasts |
| NF                               | 6           | composite plant | 19          | root hairs    |
| CO5                              | 4           | ROC             | 32          | atrichoblasts |
